# Supplementary material for: Interactive Curve-Linear Relationship Between Alteration of Carbohydrate Macromolecular Structure Traits in Hulless Barley (Hordeum vulgare L.) Grain and Nutrient Utilization, Biodegradation, and Bioavailability
Source: Int J Mol Sci. 2019 Mar 18;20(6):1366. doi: 10.3390/ijms20061366 (PMC6471004; doi:10.3390/ijms20061366)
Supplement: Supplementary file 1 [file ijms-20-01366-s001.pdf]

**Suppl. Table 1.** Alteration of Carbohydrate macromolecular structure traits and sampling years of four developed hulless barley cultivars which vary in macromoleculars of amylose, amylopectin and  $\beta$ -glucan levels.

| Lines or variety with alteration of carbohydrate macromolecular structure traits | Samples replications | Macromolecular Amylose (g/kg starch) | Macromolecular Amylopectin (g/kg starch) | Macromolecular $\beta$ -glucan (% DM) |
|----------------------------------------------------------------------------------|----------------------|--------------------------------------|------------------------------------------|---------------------------------------|
| CDC Fibar                                                                        | Y1, Y2, Y3           | 0.0                                  | 1000.0                                   | Very high                             |
| CDC Rattan                                                                       | Y1, Y2, Y3           | 50.0                                 | 950.0                                    | High                                  |
| CDC McGwire                                                                      | Y1, Y2, Y3           | 250.0                                | 750.0                                    | Normal                                |
| HB08302                                                                          | Y1, Y2               | 400.0                                | 600.0                                    | High                                  |
